# Supplementary material
Source: publisher figshare collection journal article supplement (https://geolsoc.figshare.com/ndownloader/files/28380085)
Supplement: Supplementary file 1 [file 28380085]

## Sheet: Supplementary Table 7
Supplementary Table 7: Geochemical data for diagenetic phases from the Mochars core. SSK (Subsample Keyworth) numbers identify specimens from which typically three subsamples were extracted uniquely. Standard data relevant for respective samples can be linked via the analysis date.
sample	SSK	depth max		depth min		depth	type	comments	CaCO3	CaCO3	Lab	analysis	δ13C	δ18O	Δ13C	Δ18O	Lab	analysis	Mg/Ca	Sr/Ca	Mn/Ca	Fe/Ca	S/Ca	P/Ca
		ft	inch	ft	inch	m			% ICP	% GS-IRMS		date	‰ VPDB	‰ VPDB	‰ vein-bulk	‰ vein-bulk		date	mmol/mol	mmol/mol	mmol/mol	mmol/mol	mmol/mol	mmol/mol
CVU_carb_2856	74443	2059	2	2054	1	626.859	medium vein		96.1695	98.4074	Sercon 20-22, Penryn	2017-05-09	1.04545	-4.66606	-0.00287563	-0.0534318	Agilent 5110 VDV, Penryn	2017-08-17	6.21496	1.10984	2.27613	7.59561	1.30879	-0.0276606
CVU_carb_2857	74443	2059	2	2054	1	626.859	medium vein		95.4826	98.4286	Sercon 20-22, Penryn	2017-05-09	1.15828	-4.67282	0.109951	-0.0601889	Agilent 5110 VDV, Penryn	2017-08-17	6.19375	1.10667	2.27065	7.83411	1.86012	0.0440815
CVU_carb_2858	74443	2059	2	2054	1	626.859	recryst. Shell		92.7846	97.7643	Sercon 20-22, Penryn	2017-05-09	1.49321	-3.98314	0.444883	0.629494	Agilent 5110 VDV, Penryn	2017-08-17	6.65863	0.826944	2.15149	26.5025	1.30833	0.403174
CVU_carb_2862	74452	2111	9	2106	11	642.925	patchy vein		88.0076	89.3948	Sercon 20-22, Penryn	2017-05-09	1.65076	-4.48848	-0.0472503	0.0338961	Agilent 5110 VDV, Penryn	2017-08-17	13.6308	3.4117	0.815741	6.37122	5.46126	0.0563805
CVU_carb_2863	74452	2111	9	2106	11	642.925	patchy vein		88.9412	89.3494	Sercon 20-22, Penryn	2017-05-09	1.52239	-4.47592	-0.175621	0.046451	Agilent 5110 VDV, Penryn	2017-08-17	13.5106	3.05271	0.81567	8.10353	7.41044	0.129147
CVU_carb_2710	74464	2239	2	2234	8	681.812	coarse vein		97.1055	98.6034	Sercon 20-22, Penryn	2017-05-08	1.75601	-6.0709	0.42193	-0.510489	Agilent 5110 VDV, Penryn	2017-08-15	7.18403	1.57937	0.732774	1.65526	0.769543	0.164548
CVU_carb_2711	74464	2239	2	2234	8	681.812	coarse vein		98.7085	98.9031	Sercon 20-22, Penryn	2017-05-08	1.76936	-6.04566	0.435281	-0.485248	Agilent 5110 VDV, Penryn	2017-08-15	7.19189	1.73781	0.724348	1.1993	0.315293	0.0768206
CVU_carb_2712	74464	2239	2	2234	8	681.812	coarse vein		97.2185	97.2798	Sercon 20-22, Penryn	2017-05-08	1.68234	-5.91547	0.34826	-0.355065	Agilent 5110 VDV, Penryn	2017-08-15	7.93819	1.58062	0.756569	1.65373	0.733326	0.159582
CVU_carb_2802	74465	2243	9	2239	2	683.197	medium vein		97.2557	99.6922	Sercon 20-22, Penryn	2017-05-09	1.33046	-7.41823	0.154215	-1.64168	Agilent 5110 VDV, Penryn	2017-08-17	2.76956	0.925528	1.40358	4.13064	0.404329	0.155836
CVU_carb_2803	74465	2243	9	2239	2	683.197	medium vein		95.9494	98.4414	Sercon 20-22, Penryn	2017-05-09	1.15047	-7.40806	-0.0257744	-1.63152	Agilent 5110 VDV, Penryn	2017-08-17	2.48109	0.93717	1.30299	4.2585	1.27823	0.248419
CVU_carb_2804	74465	2243	9	2239	2	683.197	medium vein		95.0091	98.7953	Sercon 20-22, Penryn	2017-05-09	1.1949	-7.62877	0.0186496	-1.85222	Agilent 5110 VDV, Penryn	2017-08-17	2.6849	0.99565	1.37707	4.34772	0.561178	0.0958562
CVU_carb_2805	74465	2243	9	2239	2	683.197	calcite pocket		95.1294	98.5128	Sercon 20-22, Penryn	2017-05-09	0.954611	-6.61494	-0.221635	-0.838389	Agilent 5110 VDV, Penryn	2017-08-17	3.13639	0.851779	1.99005	5.69144	1.61955	0.0871664
CVU_carb_2811	74466	2248	6	2243	9	684.619	thin vein		90.8813	94.4534	Sercon 20-22, Penryn	2017-05-09	2.67901	-4.75088	0.9723	0.971839	Agilent 5110 VDV, Penryn	2017-08-17	20.1335	4.30826	0.615455	3.77346	3.37576	0.36669
CVU_carb_2812	74466	2248	6	2243	9	684.619	thin vein		87.4074	89.7478	Sercon 20-22, Penryn	2017-05-09	2.61658	-4.59258	0.909871	1.13014	Agilent 5110 VDV, Penryn	2017-08-17	20.8005	4.23083	0.63981	6.00662	5.47171	0.461125
CVU_carb_2813	74466	2248	6	2243	9	684.619	vein + bulk		92.8214	93.5738	Sercon 20-22, Penryn	2017-05-09	2.76532	-4.65305	1.05861	1.06967	Agilent 5110 VDV, Penryn	2017-08-17	19.8717	4.30971	0.610497	2.53908	2.2857	0.216177
CVU_carb_2814	74466	2248	6	2243	9	684.619	slickenside		96.5795	99.9097	Sercon 20-22, Penryn	2017-05-09	1.72539	-8.25153	0.0186814	-2.52882	Agilent 5110 VDV, Penryn	2017-08-17	4.80748	1.14028	0.924401	3.26507	0.564736	0.052103
CVU_carb_2815	74466	2248	6	2243	9	684.619	slickenside		93.1847	95.8446	Sercon 20-22, Penryn	2017-05-09	1.59834	-8.21002	-0.108363	-2.4873	Agilent 5110 VDV, Penryn	2017-08-17	6.42391	1.16457	0.994783	5.85512	2.79018	0.200027
CVU_carb_2816	74466	2248	6	2243	9	684.619	slickenside		96.7697	98.4859	Sercon 20-22, Penryn	2017-05-09	1.84046	-8.34953	0.133754	-2.62681	Agilent 5110 VDV, Penryn	2017-08-17	5.67559	0.975466	1.09984	5.20189	1.04594	-0.0628351
CVU_carb_2688	74468	2285	8	2281	0	695.96	coarse vein		97.5236	100.514	Sercon 20-22, Penryn	2017-05-08	2.08128	-6.34824	0.60888	-0.750753	Agilent 5110 VDV, Penryn	2017-08-15	6.67949	1.45753	0.675258	1.58633	0.61519	0.113771
CVU_carb_2689	74468	2285	8	2281	0	695.96	coarse vein		97.6995	100.271	Sercon 20-22, Penryn	2017-05-08	1.90045	-6.89054	0.428051	-1.29305	Agilent 5110 VDV, Penryn	2017-08-15	5.29203	1.53312	0.616618	1.81986	0.947841	0.0298351
CVU_carb_2690	74468	2285	8	2281	0	695.96	coarse vein		97.7665	100.139	Sercon 20-22, Penryn	2017-05-08	1.93521	-6.43957	0.462811	-0.842077	Agilent 5110 VDV, Penryn	2017-08-15	8.28657	1.43057	0.763292	1.75506	0.748764	0.091354
CVU_carb_2851	na	2320	2	2320	2	707.187	cement		92.5409	98.9063	Sercon 20-22, Penryn	2017-05-09	2.00521	-5.50054	-0.653297	0.134683	Agilent 5110 VDV, Penryn	2017-08-17	9.92018	0.414913	1.10047	34.6255	0.335067	0.361241
CVU_carb_2852	na	2320	2	2320	2	707.187	cement		93.9996	98.8102	Sercon 20-22, Penryn	2017-05-09	2.01383	-5.6118	-0.644677	0.0234187	Agilent 5110 VDV, Penryn	2017-08-17	9.78138	0.440661	1.07463	33.8469	0.334123	0.431371
CVU_carb_2853	na	2320	2	2320	2	707.187	cement		93.6399	98.6974	Sercon 20-22, Penryn	2017-05-09	1.92323	-5.55853	-0.735279	0.0766938	Agilent 5110 VDV, Penryn	2017-08-17	11.0797	0.465649	1.12876	37.4993	0.440076	0.47786
CVU_carb_2748	74476	2397	3	2392	3	729.92	coarse vein		98.0766	100.581	Sercon 20-22, Penryn	2017-05-08	3.10501	-5.49825	0.670912	0.308562	Agilent 5110 VDV, Penryn	2017-08-15	10.6328	2.6625	0.660569	0.39377	0.0944281	0.0558561
CVU_carb_2749	74476	2397	3	2392	3	729.92	coarse vein		98.0961	99.1755	Sercon 20-22, Penryn	2017-05-08	3.04829	-5.42121	0.614196	0.3856	Agilent 5110 VDV, Penryn	2017-08-15	10.5544	2.56803	0.64861	0.398877	0.420043	0.170692
CVU_carb_2750	74476	2397	3	2392	3	729.92	coarse vein		97.8964	99.8243	Sercon 20-22, Penryn	2017-05-08	2.96308	-5.50557	0.528986	0.301241	Agilent 5110 VDV, Penryn	2017-08-15	9.87026	2.83	0.625181	0.327508	0.294455	-0.0403988
CVU_carb_2894	74477	2411	5	2406	9	734.289	alveolar cement		77.984	81.6707	Sercon 20-22, Penryn	2018-08-21	2.60865	-4.29689			Agilent 5110 VDV, Penryn	2017-08-17	7.62001	3.93597	0.44851	0.27048	87.0528	0.144253
CVU_carb_2860	74478	2429	9	2425	5	739.927	vein + bulk		92.8681	93.9473	Sercon 20-22, Penryn	2017-05-09	2.90814	-5.35783	0.209156	0.0858591	Agilent 5110 VDV, Penryn	2017-08-17	17.4809	3.47255	0.487795	2.48358	2.08062	0.0230252
CVU_carb_2847	74479	2434	5	2429	9	741.299	slickenside		94.4628	94.9437	Sercon 20-22, Penryn	2017-05-09	2.71584	-5.61587	-0.0496692	0.265605	Agilent 5110 VDV, Penryn	2017-08-17	15.6448	3.34702	0.446245	2.19209	1.15878	0.156474
CVU_carb_2848	74479	2434	5	2429	9	741.299	slickenside		95.1407	97.8976	Sercon 20-22, Penryn	2017-05-09	2.8331	-5.42754	0.0675881	0.453928	Agilent 5110 VDV, Penryn	2017-08-17	13.5557	3.3896	0.393073	1.18004	1.33324	0.0604401
CVU_carb_2849	74479	2434	5	2429	9	741.299	slickenside		97.5271	99.5865	Sercon 20-22, Penryn	2017-05-09	2.80342	-5.47864	0.0379096	0.402838	Agilent 5110 VDV, Penryn	2017-08-17	13.2461	3.43311	0.38543	0.186106	1.10481	-0.0249475
CVU_carb_2786	74481	2444	3	2438	11	744.195	thin vein		95.6147	96.8803	Sercon 20-22, Penryn	2017-05-09	4.20405	-4.30442	1.54029	1.29078	Agilent 5110 VDV, Penryn	2017-08-17	16.3311	0.991601	0.381205	4.75923	1.47097	0.168345
CVU_carb_2787	74481	2444	3	2438	11	744.195	thin vein		94.2741	97.9855	Sercon 20-22, Penryn	2017-05-09	4.08844	-4.3321	1.42468	1.2631	Agilent 5110 VDV, Penryn	2017-08-17	16.4891	1.05519	0.387891	5.27826	2.69643	0.0625257
CVU_carb_2788	74481	2444	3	2438	11	744.195	thin vein		95.0719	97.2255	Sercon 20-22, Penryn	2017-05-09	4.15865	-4.21795	1.49488	1.37725	Agilent 5110 VDV, Penryn	2017-08-17	16.7865	1.08658	0.390034	5.02583	1.71568	0.301296
CVU_carb_2822	74482	2448	10	2444	3	745.706	medium vein		97.1917	99.5318	Sercon 20-22, Penryn	2017-05-09	3.16902	-5.12599	0.657804	-0.0806067	Agilent 5110 VDV, Penryn	2017-08-17	8.63774	2.80867	0.546248	0.631484	0.475351	0.118912
CVU_carb_2823	74482	2448	10	2444	3	745.706	medium vein		97.6258	100.079	Sercon 20-22, Penryn	2017-05-09	3.57542	-4.40196	1.0642	0.643419	Agilent 5110 VDV, Penryn	2017-08-17	8.79459	2.52805	0.559037	0.815412	0.0445839	0.112426
CVU_carb_2824	74482	2448	10	2444	3	745.706	medium vein		94.8492	96.8313	Sercon 20-22, Penryn	2017-05-09	3.08038	-5.26828	0.569162	-0.222896	Agilent 5110 VDV, Penryn	2017-08-17	9.43896	3.06331	0.523389	2.13032	1.78555	0.193988
CVU_carb_2825	74482	2448	10	2444	3	745.706	thin vein		96.7471	98.8653	Sercon 20-22, Penryn	2017-05-09	2.41954	-3.74747	-0.091674	1.29791	Agilent 5110 VDV, Penryn	2017-08-17	12.7691	3.43127	0.485996	0.767167	0.81187	0.0022119
CVU_carb_2826	74482	2448	10	2444	3	745.706	thin vein		96.1589	98.6886	Sercon 20-22, Penryn	2017-05-09	2.4396	-3.85285	-0.071612	1.19253	Agilent 5110 VDV, Penryn	2017-08-17	12.7694	3.45162	0.488267	0.777392	0.842903	0.129648
CVU_carb_2854	74485	2471	6	2466	10	752.602	thin vein		92.3857	95.7902	Sercon 20-22, Penryn	2017-05-09	2.73028	-4.06096	0.0717754	1.57426	Agilent 5110 VDV, Penryn	2017-08-17	18.9954	1.17164	0.679566	6.00678	6.75016	0.309748
CVU_carb_2772	74487	2529	7	2525	0	770.319	medium vein		96.5032	98.9819	Sercon 20-22, Penryn	2017-05-08	2.45928	-5.20753	0.155798	0.431462	Agilent 5110 VDV, Penryn	2017-08-15	10.9562	3.04845	1.36839	5.92591	0.648328	0.0551548
CVU_carb_2773	74487	2529	7	2525	0	770.319	medium vein		96.1053	99.0822	Sercon 20-22, Penryn	2017-05-08	2.46409	-5.01872	0.160602	0.620265	Agilent 5110 VDV, Penryn	2017-08-15	11.1089	3.01199	1.38128	6.07413	0.556512	0.0800031
CVU_carb_2774	74487	2529	7	2525	0	770.319	medium vein		97.0765	98.9772	Sercon 20-22, Penryn	2017-05-08	2.38257	-5.18639	0.0790825	0.452601	Agilent 5110 VDV, Penryn	2017-08-15	10.7361	3.01205	1.36176	5.85975	0.487485	0.174666
CVU_carb_2869	74547	2858	10	2854	1	870.649	thin vein		95.9407	95.8011	Sercon 20-22, Penryn	2017-05-09	-1.81511	-4.23499	-3.13791	0.646927	Agilent 5110 VDV, Penryn	2017-08-17	10.7582	2.81366	0.598772	2.16959	1.63025	0.110203
CVU_carb_2839	74554	2980	0	2975	7	907.631	thin vein		97.3393	99.963	Sercon 20-22, Penryn	2017-05-09	-1.42138	-4.84546	-3.48802	-0.61833	Agilent 5110 VDV, Penryn	2017-08-17	12.5983	0.926103	0.419885	0.35133	1.03636	0.0613146
CVU_carb_2840	74554	2980	0	2975	7	907.631	thin vein		98.3527	101.616	Sercon 20-22, Penryn	2017-05-09	-1.52787	-4.92632	-3.59452	-0.699188	Agilent 5110 VDV, Penryn	2017-08-17	12.4277	0.891313	0.398631	0.0661749	0.527992	0.0800212
CVU_carb_2841	74554	2980	0	2975	7	907.631	thin vein		96.398	99.7988	Sercon 20-22, Penryn	2017-05-09	-1.28975	-4.55842	-3.35639	-0.331292	Agilent 5110 VDV, Penryn	2017-08-17	13.5119	0.921374	0.438555	0.851581	0.907681	0.07705
CVU_carb_0809	53661	3036	5	3031	8	924.776	thin vein				IsoPrime, Copenhagen	2015-01-21	1.806	-6.484			Optima 7000DV, Copenhagen	2015-02-02	9.62866	0.785568	0.709068	5.71936
CVU_carb_0810	53661	3036	5	3031	8	924.776	thin vein				IsoPrime, Copenhagen	2015-01-21	1.722	-6.373			Optima 7000DV, Copenhagen	2015-02-02	9.36759	0.997089	0.668495	5.03755
CVU_carb_0811	53661	3036	5	3031	8	924.776	thin vein				IsoPrime, Copenhagen	2015-01-21	1.793	-6.607			Optima 7000DV, Copenhagen	2015-02-02	8.53225	0.707393	0.711465	5.83194
CVU_carb_2828	74557	3036	5	3031	8	924.776	medium vein		82.0405	82.6082	Sercon 20-22, Penryn	2017-05-09	-0.225009	0.00756321	2.82584	0.998492	Agilent 5110 VDV, Penryn	2017-08-17	15.8624	0.568088	0.369655	2.2218	1.68685	0.40454
CVU_carb_2829	74557	3036	5	3031	8	924.776	medium vein		66.0396	71.4804	Sercon 20-22, Penryn	2017-05-09	-1.81545	0.00852853	1.2354	0.999457	Agilent 5110 VDV, Penryn	2017-08-17	18.3037	0.649191	0.443872	11.8309	16.7404	0.47552
CVU_carb_2873	74558	3059	6	3054	8	931.799	medium vein		94.6931	99.6358	Sercon 20-22, Penryn	2017-05-09	2.03624	-6.76949	-1.48129	-3.2878	Agilent 5110 VDV, Penryn	2017-08-17	8.05363	0.937695	0.595555	5.94972	0.817927	0.070661
CVU_carb_2874	74558	3059	6	3054	8	931.799	medium vein		95.0811	99.8158	Sercon 20-22, Penryn	2017-05-09	2.0381	-6.7849	-1.47943	-3.30321	Agilent 5110 VDV, Penryn	2017-08-17	8.8931	0.93104	0.614332	6.38722	0.785967	0.0178586
CVU_carb_2831	74559	3064	1	3059	6	933.234	thin vein		96.9048	101.303	Sercon 20-22, Penryn	2017-05-09	1.1391	-3.99046	-2.33072	0.142828	Agilent 5110 VDV, Penryn	2017-08-17	10.0198	1.19661	0.380434	0.54764	0.842317	-0.0741341
CVU_carb_2832	74559	3064	1	3059	6	933.234	thin vein		96.5629	98.63	Sercon 20-22, Penryn	2017-05-09	1.10725	-3.97031	-2.36257	0.162969	Agilent 5110 VDV, Penryn	2017-08-17	10.1636	1.22651	0.375499	0.540872	1.37197	0.135197
CVU_carb_2833	74559	3064	1	3059	6	933.234	thin vein		97.3601	99.3548	Sercon 20-22, Penryn	2017-05-09	1.04411	-3.99977	-2.42571	0.133514	Agilent 5110 VDV, Penryn	2017-08-17	9.73667	1.38633	0.371659	0.410475	1.14608	0.04814
CVU_carb_2794	74560	3073	1	3068	6	935.977	medium vein		97.1447	99.0537	Sercon 20-22, Penryn	2017-05-09	1.07861	-4.32324	-2.64847	-1.83637	Agilent 5110 VDV, Penryn	2017-08-17	8.89896	1.07109	0.402615	0.235302	0.427866	-0.00338046
CVU_carb_2795	74560	3073	1	3068	6	935.977	medium vein		97.0339	99.0481	Sercon 20-22, Penryn	2017-05-09	0.969905	-4.23442	-2.75717	-1.74754	Agilent 5110 VDV, Penryn	2017-08-17	9.6232	1.4361	0.382766	1.60658	1.43957	0.231051
CVU_carb_2796	74560	3073	1	3068	6	935.977	medium vein		97.2341	99.7316	Sercon 20-22, Penryn	2017-05-09	0.740404	-3.95809	-2.98667	-1.47121	Agilent 5110 VDV, Penryn	2017-08-17	9.21825	1.26658	0.383643	0.148549	0.506058	0.137024
CVU_carb_2865	74561	3082	4	3077	10	938.809	thin vein		96.1743	96.7644	Sercon 20-22, Penryn	2017-05-09	1.49475	-4.15939	-2.30827	0.413887	Agilent 5110 VDV, Penryn	2017-08-17	9.713	1.15227	0.333477	0.800362	1.55225	0.105727
CVU_carb_2866	74561	3082	4	3077	10	938.809	thin vein		97.228	98.0102	Sercon 20-22, Penryn	2017-05-09	1.45252	-7.04368	-2.35051	-2.4704	Agilent 5110 VDV, Penryn	2017-08-17	5.27257	1.80411	0.342176	0.143743	1.25013	-0.0149008
CVU_carb_2867	74561	3082	4	3077	10	938.809	thin vein		85.1905	86.3143	Sercon 20-22, Penryn	2017-05-09	1.35787	-6.71804	-2.44516	-2.14477	Agilent 5110 VDV, Penryn	2017-08-17	10.0308	3.50106	0.392305	4.09756	27.3574	0.0855482
CVU_carb_4152	78724	3095	8	3091	4	942.899	coarse vein		96.4519	99.1606	Sercon 20-22, Penryn	2018-09-07	2.69714	-5.6534	-0.732864	-1.4634	Agilent 5110 VDV, Penryn	2018-09-07	7.79763	1.05027	0.44427	0.0700734	0.299017	0.125817
CVU_carb_4153	78724	3095	8	3091	4	942.899	coarse vein		96.1088	99	Sercon 20-22, Penryn	2018-10-02	2.69	-5.66	-0.74	-1.47	Agilent 5110 VDV, Penryn	2018-09-07	7.73679	1.00574	0.432881	0.173459	0.204909	0.0590596
CVU_carb_4154	78724	3095	8	3091	4	942.899	coarse vein		96.7299	99.3	Sercon 20-22, Penryn	2018-10-02	2.53	-5.32	-0.9	-1.13	Agilent 5110 VDV, Penryn	2018-09-07	8.05917	1.25989	0.422448	0.104641	-0.0919982	0.139957
CVU_carb_2843	74562	3095	9	3091	4	942.912	coarse vein		96.6977	98.3558	Sercon 20-22, Penryn	2017-05-09	2.76103	-5.39869	-0.708672	-1.23106	Agilent 5110 VDV, Penryn	2017-08-17	7.93857	0.932495	0.441236	0.101604	0.345962	0.0606184
CVU_carb_2844	74562	3095	9	3091	4	942.912	coarse vein		97.5169	100.324	Sercon 20-22, Penryn	2017-05-09	2.883	-5.68625	-0.586697	-1.51862	Agilent 5110 VDV, Penryn	2017-08-17	7.52279	0.844508	0.449144	0.0227553	0.201743	0.00415425
CVU_carb_2845	74562	3095	9	3091	4	942.912	coarse vein		97.8077	100.124	Sercon 20-22, Penryn	2017-05-09	2.70116	-5.46963	-0.768538	-1.302	Agilent 5110 VDV, Penryn	2017-08-17	7.86539	0.882206	0.448625	0.0217668	0.361809	-0.0277991
CVU_carb_2835	74564	3124	1	3119	4	951.497	thin vein		95.8498	98.8327	Sercon 20-22, Penryn	2017-05-09	2.60625	-4.41117	-0.913756	0.0582261	Agilent 5110 VDV, Penryn	2017-08-17	13.5658	4.46855	0.427507	1.11571	4.98956	0.00380375
CVU_carb_2836	74564	3124	1	3119	4	951.497	thin vein		96.8329	98.6322	Sercon 20-22, Penryn	2017-05-09	2.46392	-4.49505	-1.05609	-0.0256571	Agilent 5110 VDV, Penryn	2017-08-17	13.4341	3.82043	0.41996	0.509809	2.30063	0.0656852
CVU_carb_2837	74564	3124	1	3119	4	951.497	thin vein		95.2454	98.5019	Sercon 20-22, Penryn	2017-05-09	2.37018	-4.74129	-1.14983	-0.271891	Agilent 5110 VDV, Penryn	2017-08-17	13.8528	5.16401	0.425688	1.29244	5.15833	0.11412
CVU_carb_3203	78727	3124	1	3119	4	951.497	thin vein		95.1874	98.1785	Sercon 20-22, Penryn	2018-09-07	2.48901	-4.72527	-0.940987	-0.0852741	Agilent 5110 VDV, Penryn	2017-12-15	13.3308	5.63542	0.428659	0.297993	5.60404	0.085607
CVU_carb_3204	78727	3124	1	3119	4	951.497	thin vein		96.4562	99.0445	Sercon 20-22, Penryn	2018-09-07	2.44161	-4.24637	-0.988387	0.393625	Agilent 5110 VDV, Penryn	2017-12-15	13.3974	3.24864	0.425462	0.0273412	0.970718	0.157069
CVU_carb_3205	78727	3124	1	3119	4	951.497	thin vein		94.9923	97.5917	Sercon 20-22, Penryn	2018-09-07	2.51695	-4.61151	-0.913054	0.0284878	Agilent 5110 VDV, Penryn	2017-12-15	13.1371	4.98069	0.414389	0.282831	4.18969	0.0947298
CVU_carb_2744	74565	3143	0	3138	4	957.275	coarse vein		97.7775	100.054	Sercon 20-22, Penryn	2017-05-08	2.88025	-5.27458	-0.208033	-0.625193	Agilent 5110 VDV, Penryn	2017-08-15	10.3363	2.18858	0.324154	0.0134434	0.261566	0.0624107
CVU_carb_2745	74565	3143	0	3138	4	957.275	coarse vein		98.3982	100	Sercon 20-22, Penryn	2017-05-08	2.81285	-4.9217	-0.275437	-0.272318	Agilent 5110 VDV, Penryn	2017-08-15	10.563	2.03184	0.32536	0.15983	0.668389	-0.0870044
CVU_carb_2746	74565	3143	0	3138	4	957.275	coarse vein		99.4708	100.544	Sercon 20-22, Penryn	2017-05-08	2.88564	-5.66808	-0.202652	-1.0187	Agilent 5110 VDV, Penryn	2017-08-15	7.38308	1.58633	0.282095	0.000341142	0.250076	0.0292784
CVU_carb_2763	74566	3146	11	3143	0	958.583	coarse vein		97.4967	98.8514	Sercon 20-22, Penryn	2017-05-08	3.10968	-6.91918	-0.437346	-1.76502	Agilent 5110 VDV, Penryn	2017-08-15	9.66623	1.46	0.413702	0.331946	1.57966	-0.0447278
CVU_carb_2764	74566	3146	11	3143	0	958.583	coarse vein		98.2079	100.262	Sercon 20-22, Penryn	2017-05-08	3.14537	-7.07058	-0.401661	-1.91642	Agilent 5110 VDV, Penryn	2017-08-15	9.36415	1.02361	0.434679	0.0797699	0.694637	0.0525927
CVU_carb_2765	74566	3146	11	3143	0	958.583	coarse vein		99.0156	99.9373	Sercon 20-22, Penryn	2017-05-08	3.15458	-6.69919	-0.392444	-1.54503	Agilent 5110 VDV, Penryn	2017-08-15	9.62931	0.998954	0.425287	0.0388187	0.487645	-0.010831
CVU_carb_2766	74566	3146	11	3143	0	958.583	slickenside		98.7853	100.37	Sercon 20-22, Penryn	2017-05-08	2.85962	-7.49205	-0.687409	-2.33789	Agilent 5110 VDV, Penryn	2017-08-15	6.57577	2.51915	0.334105	0.0422859	0.299756	-0.0530737
CVU_carb_2767	74566	3146	11	3143	0	958.583	slickenside		98.0123	100.074	Sercon 20-22, Penryn	2017-05-08	2.83665	-7.29486	-0.710376	-2.1407	Agilent 5110 VDV, Penryn	2017-08-15	7.23963	3.41059	0.331706	0.0646015	0.312326	-0.195709
CVU_carb_2768	74566	3146	11	3143	0	958.583	slickenside		97.1252	97.9156	Sercon 20-22, Penryn	2017-05-08	2.81676	-7.22599	-0.730269	-2.07183	Agilent 5110 VDV, Penryn	2017-08-15	11.2815	4.05183	0.388021	1.2213	1.75394	0.25351
CVU_carb_2769	74566	3146	11	3143	0	958.583	medium vein		94.2093	93.7674	Sercon 20-22, Penryn	2017-05-08	3.2334	-6.16561	-0.313628	-1.01145	Agilent 5110 VDV, Penryn	2017-08-15	12.9122	1.8129	0.41073	1.26838	10.1785	0.135916
CVU_carb_2770	74566	3146	11	3143	0	958.583	medium vein		98.2718	98.8044	Sercon 20-22, Penryn	2017-05-08	3.16305	-5.87213	-0.38398	-0.717974	Agilent 5110 VDV, Penryn	2017-08-15	9.50892	1.5717	0.303507	0.771723	5.2444	0.154378
CVU_carb_3191	78729	3146	11	3143	0	958.583	coarse slickenside		94.2919	90.9108	Sercon 20-22, Penryn	2018-09-07	1.96538	-5.10558	-1.80848	-0.371394	Agilent 5110 VDV, Penryn	2017-12-15	10.7798	4.36782	0.245287	0.179062	2.7946	0.130353
CVU_carb_3192	78729	3146	11	3143	0	958.583	coarse slickenside		93.6791	100.779	Sercon 20-22, Penryn	2018-09-07	2.39451	-5.47454	-1.37935	-0.740354	Agilent 5110 VDV, Penryn	2017-12-15	10.9538	3.41511	0.258036	0.203125	3.95279	0.173473
CVU_carb_3193	78729	3146	11	3143	0	958.583	coarse slickenside		95.119	103.797	Sercon 20-22, Penryn	2018-09-07	2.42071	-5.43669	-1.35315	-0.702503	Agilent 5110 VDV, Penryn	2017-12-15	9.27672	3.46563	0.236636	0.0837828	2.10373	0.198471
CVU_carb_3194	78729	3146	11	3143	0	958.583	medium vein		96.0271	99.1621	Sercon 20-22, Penryn	2018-09-07	2.99097	-5.83954	-0.782884	-1.10535	Agilent 5110 VDV, Penryn	2017-12-15	9.29684	1.681	0.282629	0.0140929	0.550602	0.0377436
CVU_carb_3195	78729	3146	11	3143	0	958.583	medium vein		96.0285	98.0872	Sercon 20-22, Penryn	2018-09-07	2.9224	-5.64871	-0.85146	-0.914528	Agilent 5110 VDV, Penryn	2017-12-15	11.0466	1.87566	0.29682	0.171122	1.12721	0.134105
CVU_carb_3196	78729	3146	11	3143	0	958.583	medium vein		95.8996	98.9327	Sercon 20-22, Penryn	2018-09-07	3.14363	-5.63178	-0.630232	-0.897591	Agilent 5110 VDV, Penryn	2017-12-15	10.0798	1.51661	0.328507	0.0634198	0.428724	0.122148
CVU_carb_4120	78729	3146	11	3143	0	958.583	coarse vein		96.0657	98.1466	Sercon 20-22, Penryn	2018-09-07	2.58956	-5.22235	-1.1843	-0.488163	Agilent 5110 VDV, Penryn	2018-09-07	11.2237	4.10477	0.266415	0.179254	0.507184	0.115364
CVU_carb_4121	78729	3146	11	3143	0	958.583	coarse vein		96.1675	98.3077	Sercon 20-22, Penryn	2018-09-07	2.42795	-5.41943	-1.34591	-0.685247	Agilent 5110 VDV, Penryn	2018-09-07	8.6741	4.04028	0.238328	0.122037	0.700106	0.112793
CVU_carb_4122	78729	3146	11	3143	0	958.583	coarse vein		94.6893	96.4274	Sercon 20-22, Penryn	2018-09-07	2.67029	-5.37181	-1.10357	-0.637623	Agilent 5110 VDV, Penryn	2018-09-07	12.9701	3.27298	0.268646	0.827056	1.40222	0.125762
CVU_carb_2696	74567	3153	0	3147	0	960.12	coarse vein		98.5723	99.6206	Sercon 20-22, Penryn	2017-05-08	2.91373	-7.79571	-0.853031	-2.92461	Agilent 5110 VDV, Penryn	2017-08-15	9.2406	2.77835	0.449184	0.15597	1.17971	0.143065
CVU_carb_2697	74567	3153	0	3147	0	960.12	coarse vein		98.3672	99.2925	Sercon 20-22, Penryn	2017-05-08	3.10803	-6.91028	-0.658729	-2.03918	Agilent 5110 VDV, Penryn	2017-08-15	9.10525	2.98249	0.345936	0.00861453	0.687583	0.10565
CVU_carb_2698	74567	3153	0	3147	0	960.12	coarse vein		98.09	99.3116	Sercon 20-22, Penryn	2017-05-08	3.02252	-7.11638	-0.744236	-2.24528	Agilent 5110 VDV, Penryn	2017-08-15	5.03047	3.46118	0.271086	0.139387	0.52343	0.0748135
CVU_carb_2699	74567	3153	0	3147	0	960.12	coarse pocket		99.3311	99.3303	Sercon 20-22, Penryn	2017-05-08	3.33507	-5.9413	-0.431688	-1.0702	Agilent 5110 VDV, Penryn	2017-08-15	12.2999	1.63865	0.341139	0.0970086	0.463093	0.0474451
CVU_carb_2700	74567	3153	0	3147	0	960.12	coarse pocket		98.7183	99.5913	Sercon 20-22, Penryn	2017-05-08	3.33752	-6.01643	-0.429238	-1.14532	Agilent 5110 VDV, Penryn	2017-08-15	11.132	1.82386	0.323614	0.201849	0.563016	0.156625
CVU_carb_2701	74567	3153	0	3147	0	960.12	coarse pocket		98.7751	100.17	Sercon 20-22, Penryn	2017-05-08	3.36404	-5.68241	-0.402717	-0.811308	Agilent 5110 VDV, Penryn	2017-08-15	11.5059	1.81123	0.32544	0.0992527	0.68947	0.202194
CVU_carb_0796	53631	3157	0	3153	0	961.644	sparry calcite vein				IsoPrime, Copenhagen	2015-01-21	3.302	-5.765			Optima 7000DV, Copenhagen	2015-02-02	11.899	1.53822	0.350999	0.120101
CVU_carb_0797	53631	3157	0	3153	0	961.644	sparry calcite vein				IsoPrime, Copenhagen	2015-01-21	3.416	-6.007			Optima 7000DV, Copenhagen	2015-02-02	12.294	1.24958	0.358708	0.0917395
CVU_carb_0798	53631	3157	0	3153	0	961.644	sparry calcite vein				IsoPrime, Copenhagen	2015-01-21	3.39	-6.116			Optima 7000DV, Copenhagen	2015-02-02	12.8066	1.05169	0.383612	0.0825605
CVU_carb_0799	53631	3157	0	3153	0	961.644	slickenside				IsoPrime, Copenhagen	2015-01-21	2.835	-7.53			Optima 7000DV, Copenhagen	2015-02-02	10.0431	3.50357	0.363036	0.179594
CVU_carb_0800	53631	3157	0	3153	0	961.644	slickenside				IsoPrime, Copenhagen	2015-01-21	3.141	-6.507			Optima 7000DV, Copenhagen	2015-02-02	11.6987	5.45785	0.318946	0.778976
CVU_carb_0801	53631	3157	0	3153	0	961.644	slickenside				IsoPrime, Copenhagen	2015-01-21	3.363	-5.892			Optima 7000DV, Copenhagen	2015-02-02	13.5362	2.74151	0.332191	1.37047
CVU_carb_2790	74568	3157	10	3153	0	961.771	coarse vein		97.6214	99.4699	Sercon 20-22, Penryn	2017-05-09	2.97196	-6.92907	-0.692575	-1.92564	Agilent 5110 VDV, Penryn	2017-08-17	6.66175	2.95835	0.288188	0.0403792	0.696979	0.108077
CVU_carb_2791	74568	3157	10	3153	0	961.771	coarse vein		97.306	98.7219	Sercon 20-22, Penryn	2017-05-09	2.89792	-7.49352	-0.76661	-2.49009	Agilent 5110 VDV, Penryn	2017-08-17	5.19858	1.97246	0.286337	0.0227347	0.591436	0.101093
CVU_carb_2792	74568	3157	10	3153	0	961.771	coarse vein		97.0962	99.7306	Sercon 20-22, Penryn	2017-05-09	3.22076	-6.36216	-0.443769	-1.35873	Agilent 5110 VDV, Penryn	2017-08-17	11.8996	1.19391	0.416258	0.0968425	0.506993	0.286992
CVU_carb_2703	74569	3162	7	3157	10	963.232	calcite pocket		98.734	99.2442	Sercon 20-22, Penryn	2017-05-08	2.84481	-7.55821	-0.763373	-3.0546	Agilent 5110 VDV, Penryn	2017-08-15	5.48184	3.43772	0.355373	0.0970984	0.256474	-0.0197917
CVU_carb_2704	74569	3162	7	3157	10	963.232	calcite pocket		99.2797	99.9313	Sercon 20-22, Penryn	2017-05-08	2.92484	-7.46236	-0.683352	-2.95875	Agilent 5110 VDV, Penryn	2017-08-15	4.79159	3.51466	0.329224	0.0741062	0.37543	0.0756242
CVU_carb_2705	74569	3162	7	3157	10	963.232	calcite pocket		98.0779	98.5391	Sercon 20-22, Penryn	2017-05-08	2.8502	-7.66727	-0.757987	-3.16366	Agilent 5110 VDV, Penryn	2017-08-15	5.27103	3.56176	0.338284	0.249243	1.2946	0.0266767
CVU_carb_2706	74569	3162	7	3157	10	963.232	slickenside		97.0763	98.666	Sercon 20-22, Penryn	2017-05-08	3.17352	-5.85842	-0.434668	-1.35481	Agilent 5110 VDV, Penryn	2017-08-15	13.6307	3.36527	0.363644	0.726824	0.984945	0.176316
CVU_carb_2707	74569	3162	7	3157	10	963.232	slickenside		92.5544	93.4032	Sercon 20-22, Penryn	2017-05-08	3.08421	-5.84566	-0.523975	-1.34205	Agilent 5110 VDV, Penryn	2017-08-15	16.4595	3.15393	0.391485	4.05452	4.15862	0.300486
CVU_carb_2708	74569	3162	7	3157	10	963.232	slickenside		97.0756	97.9645	Sercon 20-22, Penryn	2017-05-08	3.22212	-5.8408	-0.386062	-1.33719	Agilent 5110 VDV, Penryn	2017-08-15	12.8585	3.24668	0.353634	0.693569	1.8743	0.175657
CVU_carb_3206	78730	3162	7	3157	10	963.232	coarse vein		95.8258	99.3847	Sercon 20-22, Penryn	2018-09-07	2.95314	-7.30401	-0.846604	-2.51244	Agilent 5110 VDV, Penryn	2017-12-15	11.3917	2.45077	0.435287	-0.00428247	0.369225	-0.174378
CVU_carb_3207	78730	3162	7	3157	10	963.232	coarse vein		96.099	99.379	Sercon 20-22, Penryn	2018-09-07	2.95702	-7.21207	-0.84273	-2.42049	Agilent 5110 VDV, Penryn	2017-12-15	10.7582	2.41554	0.426399	0.0386675	0.0809737	0.122094
CVU_carb_3208	78730	3162	7	3157	10	963.232	coarse vein		96.7389	99.3052	Sercon 20-22, Penryn	2018-09-07	3.00661	-7.30637	-0.793143	-2.5148	Agilent 5110 VDV, Penryn	2017-12-15	7.21334	3.16308	0.361496	0.0057818	0.317361	-0.0293132
CVU_carb_3209	78730	3162	7	3157	10	963.232	slickenside		92.6549	94.0198	Sercon 20-22, Penryn	2018-09-07	2.8765	-6.60285	-0.923254	-1.81128	Agilent 5110 VDV, Penryn	2017-12-15	12.6413	3.93125	0.336552	0.486149	5.08685	0.144715
CVU_carb_3210	78730	3162	7	3157	10	963.232	slickenside		92.7166	95.2401	Sercon 20-22, Penryn	2018-09-07	2.9371	-6.70059	-0.862651	-1.90902	Agilent 5110 VDV, Penryn	2017-12-15	13.0115	4.46384	0.34093	0.525666	3.63647	0.22652
CVU_carb_3211	78730	3162	7	3157	10	963.232	slickenside		93.2508	96.2065	Sercon 20-22, Penryn	2018-09-07	3.01923	-6.47824	-0.780522	-1.68667	Agilent 5110 VDV, Penryn	2017-12-15	13.8189	4.20994	0.348272	0.433677	3.129	0.191395
CVU_carb_4124	78730	3162	7	3157	10	963.232	coarse vein		96.658	98.3298	Sercon 20-22, Penryn	2018-09-07	3.16692	-7.12311	-0.632831	-2.33153	Agilent 5110 VDV, Penryn	2018-09-07	9.79089	3.16777	0.395536	0.0299244	0.215607	0.057968
CVU_carb_4125	78730	3162	7	3157	10	963.232	coarse vein		95.802	99.1084	Sercon 20-22, Penryn	2018-09-07	2.97949	-7.52776	-0.820257	-2.73619	Agilent 5110 VDV, Penryn	2018-09-07	8.63522	1.73597	0.423696	0.0688052	0.359162	0.00632812
CVU_carb_4126	78730	3162	7	3157	10	963.232	coarse vein		96.892	98.7382	Sercon 20-22, Penryn	2018-09-07	3.17604	-7.07791	-0.623705	-2.28633	Agilent 5110 VDV, Penryn	2018-09-07	4.59457	4.7633	0.267443	0.0466883	0.266945	0.0881729
CVU_carb_2728	74570	3166	6	3162	7	964.552	coarse vein		98.3035	99.1349	Sercon 20-22, Penryn	2017-05-08	2.79628	-7.37841	-1.06003	-2.79094	Agilent 5110 VDV, Penryn	2017-08-15	6.94131	3.60983	0.330332	0.16617	0.403177	0.0613265
CVU_carb_2729	74570	3166	6	3162	7	964.552	coarse vein		98.6427	99.5561	Sercon 20-22, Penryn	2017-05-08	2.79752	-7.38873	-1.05879	-2.80126	Agilent 5110 VDV, Penryn	2017-08-15	6.45511	2.04424	0.357103	0.0121485	0.17692	0.129516
CVU_carb_2730	74570	3166	6	3162	7	964.552	coarse vein		98.3341	99.1741	Sercon 20-22, Penryn	2017-05-08	2.75537	-7.19719	-1.10094	-2.60972	Agilent 5110 VDV, Penryn	2017-08-15	7.72208	2.90683	0.365053	0.0188388	0.246718	0.133904
CVU_carb_2731	74570	3166	6	3162	7	964.552	slickenside		97.5645	98.9249	Sercon 20-22, Penryn	2017-05-08	2.67615	-7.61671	-1.18016	-3.02924	Agilent 5110 VDV, Penryn	2017-08-15	7.42061	3.79997	0.354305	0.478802	0.873635	0.0838275
CVU_carb_2732	74570	3166	6	3162	7	964.552	slickenside		97.5498	96.7014	Sercon 20-22, Penryn	2017-05-08	2.63327	-7.64002	-1.22304	-3.05255	Agilent 5110 VDV, Penryn	2017-08-15	8.34828	3.76472	0.372194	0.501635	3.39962	0.131344
CVU_carb_2733	74570	3166	6	3162	7	964.552	slickenside		98.0089	99.4313	Sercon 20-22, Penryn	2017-05-08	2.89462	-7.03607	-0.961687	-2.44859	Agilent 5110 VDV, Penryn	2017-08-15	9.07079	3.73429	0.348101	0.0804008	0.354857	0.194335
CVU_carb_2739	74571	3170	0	3166	6	965.683	coarse vein		97.6676	99.8049	Sercon 20-22, Penryn	2017-05-08	2.99389	-7.09548	-0.207943	-1.16076	Agilent 5110 VDV, Penryn	2017-08-15	5.49874	3.16602	0.320645	0.0708566	0.20839	0.0565261
CVU_carb_2740	74571	3170	0	3166	6	965.683	coarse vein		98.8504	99.7341	Sercon 20-22, Penryn	2017-05-08	2.97662	-6.96177	-0.22521	-1.02704	Agilent 5110 VDV, Penryn	2017-08-15	9.43722	3.36098	0.383161	0.074764	0.249744	0.0659233
CVU_carb_2741	74571	3170	0	3166	6	965.683	coarse vein		97.7768	99.5324	Sercon 20-22, Penryn	2017-05-08	2.97423	-6.86337	-0.227607	-0.928646	Agilent 5110 VDV, Penryn	2017-08-15	5.22683	3.693	0.296949	0.140591	0.549013	0.043236
CVU_carb_2742	74571	3170	0	3166	6	965.683	slickenside		97.7168	99.955	Sercon 20-22, Penryn	2017-05-08	3.04578	-6.83272	-0.156054	-0.897995	Agilent 5110 VDV, Penryn	2017-08-15	9.89125	3.54344	0.355069	0.251793	0.679313	0.0201837
CVU_carb_2756	74572	3174	0	3170	0	966.826	medium vein		97.3287	99.2445	Sercon 20-22, Penryn	2017-05-08	3.07906	-5.74946	-0.3117	-1.09816	Agilent 5110 VDV, Penryn	2017-08-15	11.6572	1.86095	0.370312	0.306139	1.60145	0.124456
CVU_carb_2757	74572	3174	0	3170	0	966.826	medium vein		92.7402	93.6427	Sercon 20-22, Penryn	2017-05-08	3.22646	-5.60806	-0.164307	-0.956764	Agilent 5110 VDV, Penryn	2017-08-15	13.9957	1.56533	0.394578	2.54698	11.2525	0.0741261
CVU_carb_2758	74572	3174	0	3170	0	966.826	medium vein		94.5637	97.8061	Sercon 20-22, Penryn	2017-05-08	3.17248	-5.61199	-0.218285	-0.960688	Agilent 5110 VDV, Penryn	2017-08-15	11.9424	1.8628	0.3519	1.09702	2.71503	0.107207
CVU_carb_2759	74572	3174	0	3170	0	966.826	coarse pocket		97.9601	99.186	Sercon 20-22, Penryn	2017-05-08	3.14489	-6.33262	-0.245872	-1.68133	Agilent 5110 VDV, Penryn	2017-08-15	13.8274	1.60742	0.442046	0.730583	0.73275	-0.0398946
CVU_carb_2760	74572	3174	0	3170	0	966.826	coarse pocket		98.7582	100.462	Sercon 20-22, Penryn	2017-05-08	3.09602	-6.26304	-0.294738	-1.61174	Agilent 5110 VDV, Penryn	2017-08-15	12.9623	1.35748	0.42422	0.0671027	0.417058	0.0554193
CVU_carb_2761	74572	3174	0	3170	0	966.826	coarse pocket		98.6623	99.7872	Sercon 20-22, Penryn	2017-05-08	3.13816	-6.16921	-0.252604	-1.51791	Agilent 5110 VDV, Penryn	2017-08-15	14.0642	1.33851	0.454506	0.1025	0.582549	0.0717295
CVU_carb_2721	74573	3178	6	3174	0	968.121	coarse vein		98.737	99.0273	Sercon 20-22, Penryn	2017-05-08	2.61585	-4.94055	-0.587204	-0.190706	Agilent 5110 VDV, Penryn	2017-08-15	11.3177	4.6055	0.242292	0.0368456	0.325997	0.084852
CVU_carb_2722	74573	3178	6	3174	0	968.121	coarse vein		98.0905	99.0858	Sercon 20-22, Penryn	2017-05-08	2.57898	-4.89286	-0.62407	-0.143012	Agilent 5110 VDV, Penryn	2017-08-15	11.255	4.48921	0.235522	0.0181554	0.369411	0.0898938
CVU_carb_2723	74573	3178	6	3174	0	968.121	coarse vein		98.7208	99.6203	Sercon 20-22, Penryn	2017-05-08	2.62785	-5.14188	-0.575201	-0.392033	Agilent 5110 VDV, Penryn	2017-08-15	11.3417	3.43693	0.238713	0.039729	0.548805	0.0771799
CVU_carb_2724	74573	3178	6	3174	0	968.121	slickenside		94.1962	95.5786	Sercon 20-22, Penryn	2017-05-08	2.66839	-5.55158	-0.534659	-0.801729	Agilent 5110 VDV, Penryn	2017-08-15	26.9644	5.31992	0.357495	3.14177	2.95068	0.526955
CVU_carb_2725	74573	3178	6	3174	0	968.121	slickenside		95.639	97.4073	Sercon 20-22, Penryn	2017-05-08	2.65517	-5.75062	-0.547887	-1.00077	Agilent 5110 VDV, Penryn	2017-08-15	25.4459	5.41124	0.328869	1.93193	2.15679	0.327884
CVU_carb_2726	74573	3178	6	3174	0	968.121	slickenside		97.5858	97.7555	Sercon 20-22, Penryn	2017-05-08	2.64091	-5.74956	-0.562147	-0.999712	Agilent 5110 VDV, Penryn	2017-08-15	24.5937	5.21499	0.330301	1.16937	1.54605	0.281179
CVU_carb_4180	78734	3209	4	3204	11	977.532	slickenside			95.3	Sercon 20-22, Penryn	2018-10-02	2.69	-6.57	-0.46	-1.79
CVU_carb_4181	78734	3209	4	3204	11	977.532	slickenside			94.5	Sercon 20-22, Penryn	2018-10-02	2.74	-6.39	-0.41	-1.61
CVU_carb_4182	78734	3209	4	3204	11	977.532	slickenside			90.6	Sercon 20-22, Penryn	2018-10-02	2.76	-6.2	-0.39	-1.42
CVU_carb_2807	74577	3218	2	3213	8	980.211	slickenside		91.831	91.2986	Sercon 20-22, Penryn	2017-05-09	2.63984	-6.24646	-0.198141	-1.56607	Agilent 5110 VDV, Penryn	2017-08-17	18.7824	3.3399	0.463049	3.8258	4.95648	0.11129
CVU_carb_2808	74577	3218	2	3213	8	980.211	slickenside		90.9718	92.0951	Sercon 20-22, Penryn	2017-05-09	2.73	-6.22914	-0.107977	-1.54875	Agilent 5110 VDV, Penryn	2017-08-17	20.4251	3.0828	0.4701	5.92523	6.14241	0.203658
CVU_carb_2809	74577	3218	2	3213	8	980.211	slickenside		86.6502	87.5767	Sercon 20-22, Penryn	2017-05-09	2.52026	-6.39817	-0.317717	-1.71778	Agilent 5110 VDV, Penryn	2017-08-17	22.5062	2.81225	0.52754	7.7275	6.86156	0.30583
CVU_carb_2735	74578	3222	6	3218	2	981.558	slickenside		97.3194	98.0694	Sercon 20-22, Penryn	2017-05-08	2.2309	-6.63795	-0.330153	-1.70129	Agilent 5110 VDV, Penryn	2017-08-15	12.9516	4.66613	0.429983	0.819369	0.94454	0.125863
CVU_carb_2736	74578	3222	6	3218	2	981.558	slickenside		97.7545	98.2532	Sercon 20-22, Penryn	2017-05-08	2.14917	-6.93708	-0.411877	-2.00042	Agilent 5110 VDV, Penryn	2017-08-15	9.86709	4.59553	0.405436	0.786456	0.953083	0.0793216
CVU_carb_2737	74578	3222	6	3218	2	981.558	slickenside		94.2642	97.5776	Sercon 20-22, Penryn	2017-05-08	2.40341	-6.37231	-0.157642	-1.43564	Agilent 5110 VDV, Penryn	2017-08-15	17.7643	4.57298	0.47257	2.87959	6.93092	0.204784
CVU_carb_4140	78737	3232	0	3227	4	984.402	medium vein		95.1202	97.7803	Sercon 20-22, Penryn	2018-09-07	2.98911	-5.58586	-0.026032	-0.807734	Agilent 5110 VDV, Penryn	2018-09-07	14.5884	2.46942	0.377229	0.51651	1.51634	0.225
CVU_carb_4141	78737	3232	0	3227	4	984.402	medium vein		96.5972	98.6601	Sercon 20-22, Penryn	2018-09-07	2.95082	-5.70731	-0.0643223	-0.929189	Agilent 5110 VDV, Penryn	2018-09-07	15.3626	2.25608	0.386026	0.0935055	0.230584	0.104437
CVU_carb_4142	78737	3232	0	3227	4	984.402	medium vein	some bulk rock mixed in	91.9258	93.3639	Sercon 20-22, Penryn	2018-09-07	2.50857	-6.352	-0.506571	-1.57388	Agilent 5110 VDV, Penryn	2018-09-07	17.0312	2.15545	0.500708	2.09833	1.40897	0.279912
CVU_carb_2714	74579	3245	8	3241	3	988.606	coarse pocket		98.6882	99.2596	Sercon 20-22, Penryn	2017-05-08	2.68215	-5.73256	0.145945	-0.685418	Agilent 5110 VDV, Penryn	2017-08-15	14.0834	1.54385	0.514895	0.116975	0.469143	0.116505
CVU_carb_2715	74579	3245	8	3241	3	988.606	coarse pocket		98.3181	100.018	Sercon 20-22, Penryn	2017-05-08	2.53603	-5.87586	-0.000180247	-0.828715	Agilent 5110 VDV, Penryn	2017-08-15	15.9573	1.1307	0.552869	0.163963	0.277037	0.0328815
CVU_carb_2716	74579	3245	8	3241	3	988.606	coarse pocket		99.0293	99.0804	Sercon 20-22, Penryn	2017-05-08	2.49733	-6.05816	-0.0388805	-1.01102	Agilent 5110 VDV, Penryn	2017-08-15	14.6786	1.4328	0.530126	0.0801762	0.138462	0.149421
CVU_carb_2717	74579	3245	8	3241	3	988.606	slickenside		93.2876	94.0347	Sercon 20-22, Penryn	2017-05-08	2.39426	-6.0151	-0.141943	-0.967955	Agilent 5110 VDV, Penryn	2017-08-15	19.6539	2.07682	0.519462	4.60301	4.35339	0.33978
CVU_carb_2718	74579	3245	8	3241	3	988.606	slickenside		97.5328	97.9857	Sercon 20-22, Penryn	2017-05-08	2.41329	-5.96676	-0.122921	-0.919616	Agilent 5110 VDV, Penryn	2017-08-15	14.4862	2.11017	0.479837	0.993691	1.18288	0.113636
CVU_carb_2719	74579	3245	8	3241	3	988.606	slickenside		96.9911	96.8826	Sercon 20-22, Penryn	2017-05-08	2.36041	-5.95937	-0.1758	-0.912225	Agilent 5110 VDV, Penryn	2017-08-15	15.121	2.0818	0.480572	2.04677	2.13591	0.146637
CVU_carb_4148	78739	3245	8	3241	3	988.606	coarse vein		93.3384	97.6162	Sercon 20-22, Penryn	2018-09-07	2.47968	-6.06196	-0.0892311	-1.03218	Agilent 5110 VDV, Penryn	2018-09-07	15.0979	2.08017	0.497329	0.513238	4.50314	0.232611
CVU_carb_4149	78739	3245	8	3241	3	988.606	coarse vein		95.7459	97.7014	Sercon 20-22, Penryn	2018-09-07	2.69443	-5.76543	0.12551	-0.735651	Agilent 5110 VDV, Penryn	2018-09-07	15.0411	1.59527	0.495388	0.225359	1.92128	0.0871
CVU_carb_4150	78739	3245	8	3241	3	988.606	coarse vein		96.5893	99.3302	Sercon 20-22, Penryn	2018-09-07	2.6527	-5.68681	0.0837867	-0.657029	Agilent 5110 VDV, Penryn	2018-09-07	15.0962	1.34587	0.513629	0.069908	0.517681	-0.0024732
CVU_carb_2871	74580	3250	6	3245	8	990.016	calcite pocket		95.471	98.8661	Sercon 20-22, Penryn	2017-05-09	2.6656	-5.57672	-0.0939269	-0.914098	Agilent 5110 VDV, Penryn	2017-08-17	13.9192	1.63866	0.504325	0.235515	1.09361	0.0255831
CVU_carb_2752	74581	3255	4	3250	6	991.489	coarse vein		97.9108	100.25	Sercon 20-22, Penryn	2017-05-08	2.86972	-5.38843	0.117887	-0.412896	Agilent 5110 VDV, Penryn	2017-08-15	11.7835	0.808108	0.412742	0.0396344	0.125773	0.0968607
CVU_carb_2753	74581	3255	4	3250	6	991.489	coarse vein		98.7554	99.9413	Sercon 20-22, Penryn	2017-05-08	2.77619	-5.55952	0.0243585	-0.583991	Agilent 5110 VDV, Penryn	2017-08-15	11.4897	0.767372	0.458502	0.20235	0.287861	0.0803392
CVU_carb_2754	74581	3255	4	3250	6	991.489	coarse vein		98.0009	99.7734	Sercon 20-22, Penryn	2017-05-08	2.59852	-5.81598	-0.153317	-0.840448	Agilent 5110 VDV, Penryn	2017-08-15	10.7495	1.1313	0.45735	0.112658	0.213179	0.00289084
CVU_carb_3200	78740	3255	4	3250	6	991.489	coarse vein		96.0668	99.5669	Sercon 20-22, Penryn	2018-09-07	2.449	-6.31504	-0.295353	-1.53561	Agilent 5110 VDV, Penryn	2017-12-15	12.5307	0.899038	0.559954	0.166686	0.214517	0.130053
CVU_carb_3201	78740	3255	4	3250	6	991.489	coarse vein		96.0525	100.043	Sercon 20-22, Penryn	2018-09-07	2.1335	-7.28664	-0.610852	-2.50721	Agilent 5110 VDV, Penryn	2017-12-15	11.3807	0.958149	0.644564	1.15442	0.271475	0.0746687
CVU_carb_3202	78740	3255	4	3250	6	991.489	coarse vein		95.64	100.134	Sercon 20-22, Penryn	2018-09-07	2.46242	-6.17643	-0.281933	-1.397	Agilent 5110 VDV, Penryn	2017-12-15	12.4575	0.962933	0.53444	0.264289	1.14113	0.103023
CVU_carb_4132	78740	3255	4	3250	6	991.489	coarse vein		96.7119	99.3902	Sercon 20-22, Penryn	2018-09-07	2.54494	-6.17617	-0.199415	-1.39674	Agilent 5110 VDV, Penryn	2018-09-07	11.1969	1.81462	0.462068	0.269621	1.32161	0.159901
CVU_carb_4133	78740	3255	4	3250	6	991.489	coarse vein		94.2221	96.764	Sercon 20-22, Penryn	2018-09-07	2.65258	-5.99564	-0.0917717	-1.21621	Agilent 5110 VDV, Penryn	2018-09-07	12.9087	1.35599	0.51779	0.807633	5.0197	0.116231
CVU_carb_4134	78740	3255	4	3250	6	991.489	coarse vein		95.8838	98.9581	Sercon 20-22, Penryn	2018-09-07	2.69494	-5.57174	-0.0494153	-0.792317	Agilent 5110 VDV, Penryn	2018-09-07	12.7438	1.36319	0.480627	0.262048	2.18196	0.0950606
CVU_carb_2776	74582	3264	0	3259	8	994.207	coarse pocket		98.3316	99.7294	Sercon 20-22, Penryn	2017-05-08	2.42658	-6.16711	-0.3256	-1.08879	Agilent 5110 VDV, Penryn	2017-08-15	13.9156	0.827592	0.612015	0.318147	0.503925	0.0373526
CVU_carb_2777	74582	3264	0	3259	8	994.207	coarse pocket		98.1974	100.164	Sercon 20-22, Penryn	2017-05-08	2.28364	-6.28674	-0.46854	-1.20842	Agilent 5110 VDV, Penryn	2017-08-15	12.6629	0.87109	0.596725	0.500247	0.259875	-0.0237267
CVU_carb_2778	74582	3264	0	3259	8	994.207	coarse pocket		97.6618	100.191	Sercon 20-22, Penryn	2017-05-09	2.3897	-6.19009	-0.362481	-1.11177	Agilent 5110 VDV, Penryn	2017-08-15	13.5973	0.875135	0.614542	0.398616	0.418704	0.0125354
CVU_carb_2779	74582	3264	0	3259	8	994.207	thin vein		97.0591	98.1378	Sercon 20-22, Penryn	2017-05-09	2.98938	-5.22731	0.237201	-0.148982	Agilent 5110 VDV, Penryn	2017-08-17	13.4447	0.957386	0.342105	0.535343	3.62139	0.181211
CVU_carb_2780	74582	3264	0	3259	8	994.207	thin vein		97.9067	99.7138	Sercon 20-22, Penryn	2017-05-09	2.89746	-5.3671	0.145281	-0.288777	Agilent 5110 VDV, Penryn	2017-08-17	12.6178	0.862472	0.339603	0.110509	0.550758	0.110022
CVU_carb_2782	74583	3268	7	3264	0	995.566	thin vein		96.4568	99.5326	Sercon 20-22, Penryn	2017-05-09	2.96597	-5.55499	0.34898	-0.368853	Agilent 5110 VDV, Penryn	2017-08-17	11.1636	0.783615	0.367427	0.141692	0.318984	-0.10912
CVU_carb_2783	74583	3268	7	3264	0	995.566	thin vein		96.8066	100.957	Sercon 20-22, Penryn	2017-05-09	3.0093	-5.23797	0.392311	-0.051832	Agilent 5110 VDV, Penryn	2017-08-17	13.9035	1.0267	0.338541	0.256281	0.356155	0.0962429
CVU_carb_2784	74583	3268	7	3264	0	995.566	thin vein		98.5497	100.309	Sercon 20-22, Penryn	2017-05-09	3.08924	-5.23146	0.472245	-0.0453244	Agilent 5110 VDV, Penryn	2017-08-17	14.2021	1.01784	0.338673	0.00319585	0.356774	0.0951674
CVU_carb_4136	78742	3268	7	3264	0	995.566	medium vein		96.9369	98.9798	Sercon 20-22, Penryn	2018-09-07	3.012	-5.37489	0.21234	-0.647698	Agilent 5110 VDV, Penryn	2018-09-07	13.3618	1.26677	0.342502	0.19255	1.12674	0.169239
CVU_carb_4137	78742	3268	7	3264	0	995.566	medium vein		96.4993	100.055	Sercon 20-22, Penryn	2018-09-07	3.06953	-5.20301	0.269869	-0.475817	Agilent 5110 VDV, Penryn	2018-09-07	14.3608	1.3323	0.32746	0.172324	1.64903	0.0930439
CVU_carb_4138	78742	3268	7	3264	0	995.566	medium vein		94.4131	96.5927	Sercon 20-22, Penryn	2018-09-07	3.03126	-5.00711	0.231599	-0.279917	Agilent 5110 VDV, Penryn	2018-09-07	16.1614	1.51026	0.326296	1.13095	1.16237	0.128193
CVU_carb_2798	74584	3277	8	3273	2	998.347	thin vein		95.2896	92.6688	Sercon 20-22, Penryn	2017-05-09	2.86478	-4.66015	0.00451349	0.107059	Agilent 5110 VDV, Penryn	2017-08-17	18.9801	40.8202	0.341027	1.90634	43.5899	0.302162
CVU_carb_2799	74584	3277	8	3273	2	998.347	thin vein		94.9311	93.6046	Sercon 20-22, Penryn	2017-05-09	3.12776	-4.66409	0.267494	0.103116	Agilent 5110 VDV, Penryn	2017-08-17	19.2573	31.762	0.351672	1.30082	35.9541	0.217467
CVU_carb_2800	74584	3277	8	3273	2	998.347	thin vein		95.805	95.9228	Sercon 20-22, Penryn	2017-05-09	3.1339	-4.66954	0.273634	0.0976681	Agilent 5110 VDV, Penryn	2017-08-17	18.4323	16.7552	0.338023	1.27912	17.1295	0.170898
CVU_carb_4104	78744	3277	8	3273	2	998.347	thin vein		93.8728	88.1979	Sercon 20-22, Penryn	2018-09-07	3.05206	-4.80576	0.29656	-0.0156122	Agilent 5110 VDV, Penryn	2018-09-07	18.9572	36.4074	0.355227	2.23383	36.5061	0.222579
CVU_carb_4105	78744	3277	8	3273	2	998.347	thin vein		95.4046	90.524	Sercon 20-22, Penryn	2018-09-07	3.13262	-4.84582	0.377124	-0.0556781	Agilent 5110 VDV, Penryn	2018-09-07	17.2583	50.7298	0.334348	0.606603	51.1471	0.107818
CVU_carb_4106	78744	3277	8	3273	2	998.347	thin vein		94.182	83.0393	Sercon 20-22, Penryn	2018-09-07	2.9807	-4.90578	0.225197	-0.115629	Agilent 5110 VDV, Penryn	2018-09-07	17.966	95.2611	0.333509	1.24003	102.168	0.134108
CVU_carb_2818	74585	3282	3	3277	8	999.731	thin vein		97.6191	99.2919	Sercon 20-22, Penryn	2017-05-09	4.05055	-4.88778	1.35839	-0.269714	Agilent 5110 VDV, Penryn	2017-08-17	19.337	2.16191	0.235808	0.190692	0.463621	0.105628
CVU_carb_2819	74585	3282	3	3277	8	999.731	thin vein		97.734	99.4171	Sercon 20-22, Penryn	2017-05-09	3.91447	-4.98895	1.22231	-0.370881	Agilent 5110 VDV, Penryn	2017-08-17	19.4395	2.21749	0.240712	0.159607	0.365612	0.052201
CVU_carb_2820	74585	3282	3	3277	8	999.731	thin vein		96.6659	99.5393	Sercon 20-22, Penryn	2017-05-09	3.93438	-4.8588	1.24223	-0.240729	Agilent 5110 VDV, Penryn	2017-08-17	19.851	2.21964	0.237665	0.448908	0.969158	0.161162
CVU_carb_4185	78746	3301	10	3297	3	1005.7	thin vein			92.9	Sercon 20-22, Penryn	2018-10-02	2.48	-4.7	0.19	0.24
CVU_carb_4186	78746	3301	10	3297	3	1005.7	thin vein			90.5	Sercon 20-22, Penryn	2018-10-02	2.53	-4.72	0.24	0.22
CVU_carb_2692	74588	3334	10	3330	4	1015.77	coarse vein		97.6435	100.821	Sercon 20-22, Penryn	2017-05-08	1.97759	-5.73736	-0.0289549	-0.911793	Agilent 5110 VDV, Penryn	2017-08-15	13.0416	3.30798	0.360477	0.128252	1.84386	0.0746241
CVU_carb_2693	74588	3334	10	3330	4	1015.77	coarse vein	mostly celestine	20.9384	21.1274	Sercon 20-22, Penryn	2017-05-08	1.66878	-6.35174	-0.337762	-1.52617	Agilent 5110 VDV, Penryn	2017-08-15
CVU_carb_2694	74588	3334	10	3330	4	1015.77	coarse vein	mostly celestine	36.3579	34.2124	Sercon 20-22, Penryn	2017-05-08	1.38176	-6.30191	-0.624786	-1.47635	Agilent 5110 VDV, Penryn	2017-08-15
CVU_carb_4128	78771	3416	9	3412	8	1040.8	medium vein	fibrous celestine	2.13207	2.23312	Sercon 20-22, Penryn	2018-09-07					Agilent 5110 VDV, Penryn	2018-09-07
CVU_carb_4129	78771	3416	9	3412	8	1040.8	medium vein	fibrous celestine	3.14309	2.96763	Sercon 20-22, Penryn	2018-09-07					Agilent 5110 VDV, Penryn	2018-09-07
CVU_carb_4130	78771	3416	9	3412	8	1040.8	medium vein	fibrous celestine	1.67215	1.82124	Sercon 20-22, Penryn	2018-09-07					Agilent 5110 VDV, Penryn	2018-09-07
CVU_carb_3197	78831	3832	11	3830	0	1167.83	coarse vein		96.3978	99.9864	Sercon 20-22, Penryn	2018-09-07	0.310277	-6.50207	-1.60344	-1.64083	Agilent 5110 VDV, Penryn	2017-12-15	8.81906	0.962441	0.401886	0.00895136	0.206386	0.0573499
CVU_carb_3198	78831	3832	11	3830	0	1167.83	coarse vein		96.5933	99.8796	Sercon 20-22, Penryn	2018-09-07	0.317801	-6.35511	-1.59592	-1.49387	Agilent 5110 VDV, Penryn	2017-12-15	8.31236	0.947695	0.382986	0.00220345	0.304049	0.129256
CVU_carb_3199	78831	3832	11	3830	0	1167.83	coarse vein		96.9393	99.6639	Sercon 20-22, Penryn	2018-09-07	1.17498	-6.20976	-0.738738	-1.34852	Agilent 5110 VDV, Penryn	2017-12-15	9.03616	0.941621	0.367663	0.0392349	0.349406	0.0645277
CVU_carb_4112	78831	3832	11	3830	0	1167.83	coarse vein		97.4967	99.4953	Sercon 20-22, Penryn	2018-09-07	1.29801	-6.20678	-0.615713	-1.34553	Agilent 5110 VDV, Penryn	2018-09-07	8.96892	0.976611	0.357827	0.161969	0.531368	0.112842
CVU_carb_4113	78831	3832	11	3830	0	1167.83	coarse vein		96.9952	99.9734	Sercon 20-22, Penryn	2018-09-07	0.978915	-6.38172	-0.934804	-1.52048	Agilent 5110 VDV, Penryn	2018-09-07	8.4378	0.896824	0.350106	0.0233575	0.295368	0.00730364
CVU_carb_4114	78831	3832	11	3830	0	1167.83	coarse vein		97.2945	99.0039	Sercon 20-22, Penryn	2018-09-07	1.44305	-6.43309	-0.470668	-1.57184	Agilent 5110 VDV, Penryn	2018-09-07	8.90596	0.990458	0.349078	0.167369	1.1536	0.188383
CVU_carb_3185	78836	3851	0	3846	0	1173.02	coarse vein		96.1849	98.4615	Sercon 20-22, Penryn	2018-09-07	0.243327	-6.42517	-2.29752	-1.87037	Agilent 5110 VDV, Penryn	2017-12-15	6.5006	0.94746	0.290619	0.191877	0.761186	0.150586
CVU_carb_3186	78836	3851	0	3846	0	1173.02	coarse vein		95.3545	98.9102	Sercon 20-22, Penryn	2018-09-07	0.409942	-6.23241	-2.13091	-1.67762	Agilent 5110 VDV, Penryn	2017-12-15	6.87831	0.965004	0.290873	0.0607419	1.05584	-0.1141
CVU_carb_3187	78836	3851	0	3846	0	1173.02	coarse vein		96.3042	99.0646	Sercon 20-22, Penryn	2018-09-07	1.38082	-6.10779	-1.16003	-1.55299	Agilent 5110 VDV, Penryn	2017-12-15	7.35143	0.831949	0.265879	0.0730652	0.731529	-0.130775
CVU_carb_3188	78836	3851	0	3846	0	1173.02	thin vein		92.5424	99.5078	Sercon 20-22, Penryn	2018-09-07	1.86458	-5.79573	-0.676267	-1.24093	Agilent 5110 VDV, Penryn	2017-12-15	12.1102	1.40429	0.298128	0.152722	0.266437	0.161953
CVU_carb_3189	78836	3851	0	3846	0	1173.02	thin vein		94.9027	97.6469	Sercon 20-22, Penryn	2018-09-07	1.73496	-5.85035	-0.805892	-1.29555	Agilent 5110 VDV, Penryn	2017-12-15	12.0568	1.39214	0.299369	0.354227	3.08692	-0.0188457
CVU_carb_3190	78836	3851	0	3846	0	1173.02	thin vein		96.2835	98.9925	Sercon 20-22, Penryn	2018-09-07	1.79192	-5.92768	-0.748933	-1.37288	Agilent 5110 VDV, Penryn	2017-12-15	11.4783	1.49214	0.296365	0.113168	0.233152	0.114416
CVU_carb_4100	78836	3851	0	3846	0	1173.02	coarse vein		96.6725	99.2133	Sercon 20-22, Penryn	2018-09-07	-1.14556	-6.60621	-3.68641	-2.05141	Agilent 5110 VDV, Penryn	2018-09-07	7.06821	0.881098	0.344527	0.121185	0.197333	0.16624
CVU_carb_4101	78836	3851	0	3846	0	1173.02	coarse vein		96.667	99.8372	Sercon 20-22, Penryn	2018-09-07	-1.72851	-6.61021	-4.26936	-2.05541	Agilent 5110 VDV, Penryn	2018-09-07	5.88486	0.700838	0.341889	0.0226387	0.233432	0.0460573
CVU_carb_4102	78836	3851	0	3846	0	1173.02	coarse vein		96.9136	99.7191	Sercon 20-22, Penryn	2018-09-07	0.975878	-6.4178	-1.56497	-1.863	Agilent 5110 VDV, Penryn	2018-09-07	6.95509	0.847291	0.278169	0.0374972	1.35332	0.0341343
CVU_carb_4176	78909	4220	0	4215	4	1285.54	slickenside	some matrix		70.2	Sercon 20-22, Penryn	2018-10-02	1.54	-5.1	-0.27	-0.81
CVU_carb_4177	78909	4220	0	4215	4	1285.54	slickenside	some matrix		67.3	Sercon 20-22, Penryn	2018-10-02	1.55	-4.93	-0.26	-0.64
CVU_carb_4178	78909	4220	0	4215	4	1285.54	slickenside	some matrix		76	Sercon 20-22, Penryn	2018-10-02	1.5	-5.16	-0.31	-0.87
CVU_carb_4160	78944	4398	4	4393	8	1339.9	slickenside	some celestine	83.9004	82.9	Sercon 20-22, Penryn	2018-10-02	0.68	-7.55	7.12	-6.7	Agilent 5110 VDV, Penryn	2018-09-07	15.2837	29.6264	3.98664	32.0161	34.9626	0.336649
CVU_carb_4161	78944	4398	4	4393	8	1339.9	slickenside	some celestine	86.5199	66.4	Sercon 20-22, Penryn	2018-10-02	0.66	-7.5	7.1	-6.65	Agilent 5110 VDV, Penryn	2018-09-07	15.0308	136.849	3.96677	32.2148	169.355	0.430616
CVU_carb_4162	78944	4398	4	4393	8	1339.9	slickenside	some celestine	89.3839	81.2	Sercon 20-22, Penryn	2018-10-02	0.7	-7.55	7.14	-6.7	Agilent 5110 VDV, Penryn	2018-09-07	12.9569	81.2107	3.92598	27.5608	96.6788	0.375516
CVU_carb_4108	78955	4449	11	4445	1	1355.6	thin vein	some bulk rock mixed in	91.6339	95.9274	Sercon 20-22, Penryn	2018-09-07	0.968543	-7.67979	1.32709	-3.12547	Agilent 5110 VDV, Penryn	2018-09-07	13.2426	1.32624	2.82772	21.0096	1.35481	0.180545
CVU_carb_4109	78955	4449	11	4445	1	1355.6	thin vein	some bulk rock mixed in	94.401	98.1906	Sercon 20-22, Penryn	2018-09-07	1.07328	-7.73393	1.43183	-3.17961	Agilent 5110 VDV, Penryn	2018-09-07	11.1868	3.74512	3.04354	17.5554	4.05688	0.287637
CVU_carb_4110	78955	4449	11	4445	1	1355.6	thin vein	some bulk rock mixed in	92.4964	95.184	Sercon 20-22, Penryn	2018-09-07	0.993102	-7.58199	1.35165	-3.02767	Agilent 5110 VDV, Penryn	2018-09-07	12.1754	8.78364	3.07668	18.6818	10.0564	0.28982
CVU_carb_4156	78956	4454	4	4449	11	1357.01	medium vein	dispersed veinlets	90.8962	94.5	Sercon 20-22, Penryn	2018-10-02	0.65	-7.68	0.46	-3.33	Agilent 5110 VDV, Penryn	2018-09-07	12.5439	0.983024	4.28244	18.3797	3.10951	0.177067
CVU_carb_4157	78956	4454	4	4449	11	1357.01	medium vein	dispersed veinlets	94.7678	98.4	Sercon 20-22, Penryn	2018-10-02	0.56	-7.69	0.37	-3.34	Agilent 5110 VDV, Penryn	2018-09-07	11.358	0.866936	4.24336	17.2437	0.899731	0.169805
CVU_carb_4158	78956	4454	4	4449	11	1357.01	medium vein	dispersed veinlets	89.9448	92.8	Sercon 20-22, Penryn	2018-10-02	0.55	-7.48	0.36	-3.13	Agilent 5110 VDV, Penryn	2018-09-07	14.5365	1.01949	4.32591	20.5126	2.11808	0.213422
CVU_carb_4116	78964	4521	0	4515	7	1377.18	thin vein		94.0563	99.8976	Sercon 20-22, Penryn	2018-09-07	-1.263	-7.7423	-0.227825	-1.96175	Agilent 5110 VDV, Penryn	2018-09-07	11.8637	1.11447	7.52698	19.9732	0.965223	0.14065
CVU_carb_4117	78964	4521	0	4515	7	1377.18	thin vein		94.585	98.5661	Sercon 20-22, Penryn	2018-09-07	-1.18058	-7.77603	-0.145408	-1.99548	Agilent 5110 VDV, Penryn	2018-09-07	11.3459	1.08397	7.29353	19.4207	0.722644	0.198404
CVU_carb_4118	78964	4521	0	4515	7	1377.18	thin vein		94.0874	99.4324	Sercon 20-22, Penryn	2018-09-07	-1.10609	-7.64181	-0.0709192	-1.86126	Agilent 5110 VDV, Penryn	2018-09-07	11.2934	1.12203	7.28079	19.2024	0.916487	0.1247
CVU_carb_4171	78966	4542	8	4537	10	1383.87	slickenside	some matrix		66	Sercon 20-22, Penryn	2018-10-02	-0.91	-7.78	-0.37	-3.49
CVU_carb_4172	78966	4542	8	4537	10	1383.87	slickenside	some matrix		78.4	Sercon 20-22, Penryn	2018-10-02	-0.81	-7.87	-0.27	-3.58
CVU_carb_4173	78966	4542	8	4537	10	1383.87	slickenside	some matrix		75.5	Sercon 20-22, Penryn	2018-10-02	-0.82	-7.81	-0.28	-3.52
CVU_carb_4164	78967	4547	8	4542	8	1385.37	crack fill	celestine	1.47623	0.4	Sercon 20-22, Penryn	2018-10-02					Agilent 5110 VDV, Penryn	2018-09-07
CVU_carb_4165	78967	4547	8	4542	8	1385.37	crack fill	celestine	0.322988	0.3	Sercon 20-22, Penryn	2018-10-02					Agilent 5110 VDV, Penryn	2018-09-07
CVU_carb_4166	78967	4547	8	4542	8	1385.37	siderite nodule	FeMgCa carbonate	19.2721	55	Sercon 20-22, Penryn	2018-10-02	-7.79	0.32	-5.58	2.93	Agilent 5110 VDV, Penryn	2018-09-07
CVU_carb_4167	78967	4547	8	4542	8	1385.37	siderite nodule	FeMgCa carbonate	11.376	52.4	Sercon 20-22, Penryn	2018-10-02	-4.89	1.07	-2.68	3.68	Agilent 5110 VDV, Penryn	2018-09-07
CVU_carb_4144	79068	5603	6	5598	9	1707.22	slickenside	some celestine	60.8597	61.7464	Sercon 20-22, Penryn	2018-09-07	0.663044	-8.74755	0.096239	-3.09664	Agilent 5110 VDV, Penryn	2018-09-07
CVU_carb_4145	79068	5603	6	5598	9	1707.22	slickenside	some celestine	91.2796	95.0802	Sercon 20-22, Penryn	2018-09-07	0.506179	-9.04893	-0.0606257	-3.39801	Agilent 5110 VDV, Penryn	2018-09-07	12.7768	2.18536	4.59203	13.8951	3.57773	-0.0694914
CVU_carb_4146	79068	5603	6	5598	9	1707.22	slickenside	some celestine	64.8332	71.7835	Sercon 20-22, Penryn	2018-09-07	0.641917	-8.65961	0.075112	-3.00869	Agilent 5110 VDV, Penryn	2018-09-07
CVU_carb_4610	78968	4552	7	4547	8	1386.88	siderite			49.1047	Sercon 20-22, Penryn	2019-02-13	-12.4955	-1.11868
